# Supplementary material
Source: MDPI journal article supplement (https://www.mdpi.com/2071-1050/15/23/16230)

# Supplementary Material

## Changes in soil chemistry and soil nutrient stocks after 30 years of treated municipal wastewater land disposal: a natural experiment

María Jesús Gutiérrez-Ginés, Brett H. Robinson, Sky Halford, Izzie Alderton, Vikki Ambrose, Jacqui Horswell and Hamish Lowe

### Interpolation of sample density based on soil C concentration

Figure S1. Relationship between soil C concentration and sample density

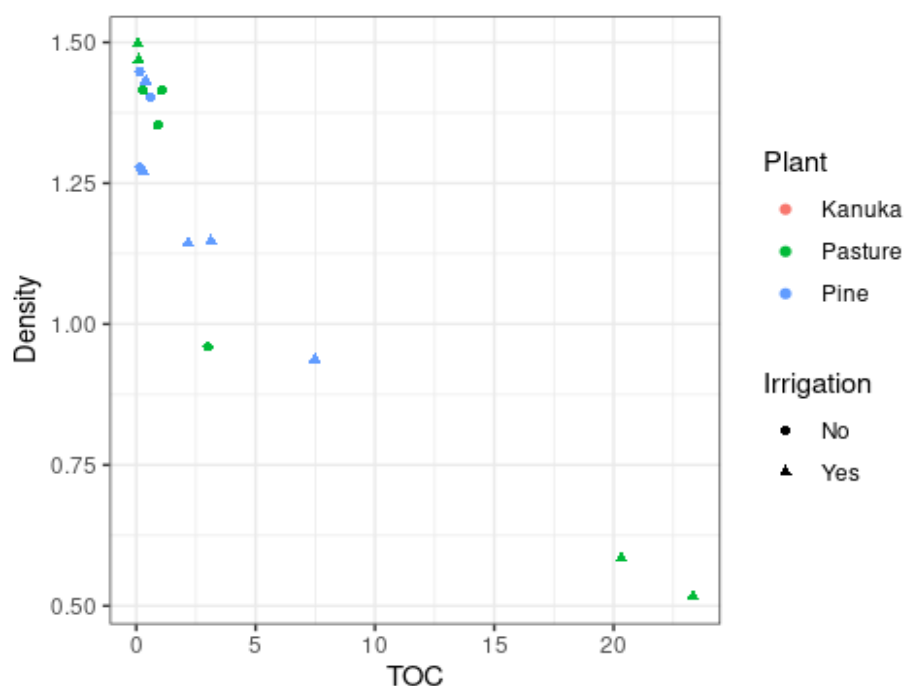

```
# Fitting an exponential model

model <- lm(Density ~ log(TOC), df)
summary (model)

##
## Call:
## lm(formula = Density ~ log(TOC), data = df)
##
## Residuals:
##      Min       1Q   Median       3Q      Max
## -0.197799 -0.106186  0.005635  0.108962  0.234662
##
## Coefficients:
##              Estimate Std. Error t value Pr(>|t|)
## (Intercept)  1.18841    0.03449   34.46 6.15e-15 ***
## log(TOC)     -0.15149    0.01940   -7.81 1.81e-06 ***
## ---
```

```
## Signif. codes:  0 '***' 0.001 '**' 0.01 '*' 0.05 '.' 0.1 ' ' 1
##
## Residual standard error: 0.1377 on 14 degrees of freedom
## (323 observations deleted due to missingness)
## Multiple R-squared:  0.8133, Adjusted R-squared:  0.8
## F-statistic: 61 on 1 and 14 DF, p-value: 1.81e-06
```

```
rm(model)
```

*# Fitting a linear model*

```
model2 <- lm(Density ~ TOC, df)
summary (model2)
```

```
##
## Call:
## lm(formula = Density ~ TOC, data = df)
##
## Residuals:
##      Min       1Q   Median       3Q      Max
## -0.28194 -0.08053  0.04734  0.08850  0.13965
##
## Coefficients:
##              Estimate Std. Error t value Pr(>|t|)
## (Intercept)  1.359833   0.034861  39.007 1.10e-15 ***
## TOC          -0.039299   0.004326  -9.084 3.03e-07 ***
## ---
## Signif. codes:  0 '***' 0.001 '**' 0.01 '*' 0.05 '.' 0.1 ' ' 1
##
## Residual standard error: 0.1214 on 14 degrees of freedom
## (323 observations deleted due to missingness)
## Multiple R-squared:  0.8549, Adjusted R-squared:  0.8446
## F-statistic: 82.51 on 1 and 14 DF, p-value: 3.03e-07
```

```
rm(model2)
```

*# Calculate densities with the different models*

```
df <- df %>%
mutate (Dens_cal1 = 1.18841 - 0.15149*(log(TOC)),
        Dens_cal2 = 1.359833 - 0.03929 * TOC) %>%
  mutate(Dens_cal4 = (Dens_cal1 + Dens_cal2)/2)
plot(df$Density, df$Dens_cal1)
```

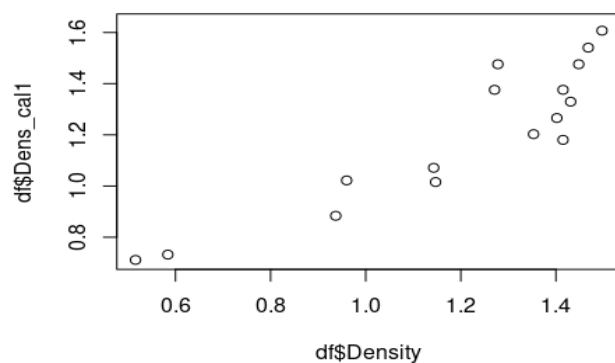

```

fit1 <- lm(Density ~ Dens_cal1, df)
summary(fit1)

##
## Call:
## lm(formula = Density ~ Dens_cal1, data = df)
##
## Residuals:
##      Min       1Q   Median       3Q      Max
## -0.197799 -0.106186  0.005635  0.108962  0.234662
##
## Coefficients:
##              Estimate Std. Error t value Pr(>|t|)
## (Intercept)  4.878e-06  1.580e-01   0.00    1
## Dens_cal1    1.000e+00  1.280e-01   7.81 1.81e-06 ***
## ---
## Signif. codes:  0 '***' 0.001 '**' 0.01 '*' 0.05 '.' 0.1 ' ' 1
##
## Residual standard error: 0.1377 on 14 degrees of freedom
## (323 observations deleted due to missingness)
## Multiple R-squared:  0.8133, Adjusted R-squared:  0.8
## F-statistic:    61 on 1 and 14 DF,  p-value: 1.81e-06

rm(fit1)

plot(df$Density, df$Dens_cal2)

```

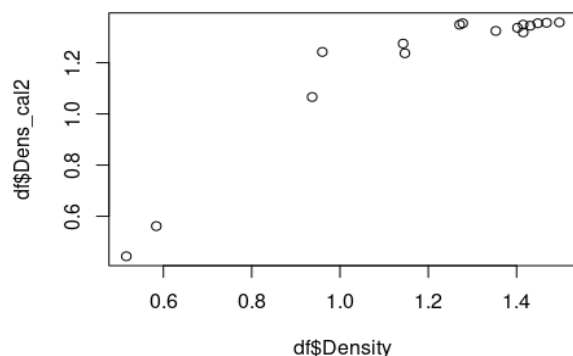

```

fit2 <- lm(Density ~ Dens_cal2, df)
summary(fit2)

##
## Call:
## lm(formula = Density ~ Dens_cal2, data = df)
##
## Residuals:
##      Min       1Q   Median       3Q      Max
## -0.28194 -0.08053  0.04734  0.08850  0.13965
##
## Coefficients:
##              Estimate Std. Error t value Pr(>|t|)
## (Intercept) -0.0003142  0.1360165  -0.002   0.998
## Dens_cal2     1.0002312  0.1101129   9.084 3.03e-07 ***
## ---
## Signif. codes:  0 '***' 0.001 '**' 0.01 '*' 0.05 '.' 0.1 ' ' 1

```

```
##
## Residual standard error: 0.1214 on 14 degrees of freedom
## (323 observations deleted due to missingness)
## Multiple R-squared: 0.8549, Adjusted R-squared: 0.8446
## F-statistic: 82.51 on 1 and 14 DF, p-value: 3.03e-07

rm(fit2)

plot(df$Density, df$Dens_cal4)
```

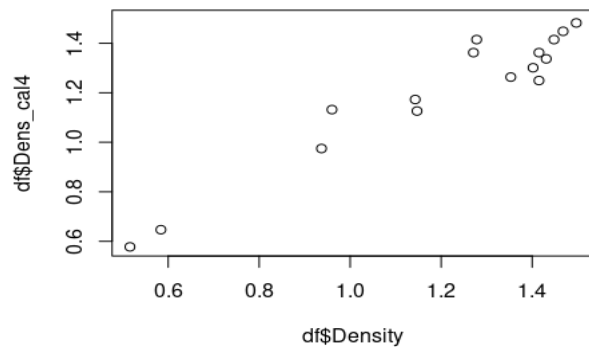

```
fit4 <- lm(Density ~ Dens_cal4, df)
summary(fit4)

##
## Call:
## lm(formula = Density ~ Dens_cal4, data = df)
##
## Residuals:
##      Min       1Q   Median       3Q      Max
## -0.164584 -0.017380 -0.001313  0.047632  0.161025
##
## Coefficients:
##              Estimate Std. Error t value Pr(>|t|)
## (Intercept)  -0.1231     0.1075  -1.144   0.272
## Dens_cal4      1.1022     0.0873  12.625 4.86e-09 ***
## ---
## Signif. codes:  0 '***' 0.001 '**' 0.01 '*' 0.05 '.' 0.1 ' ' 1
##
## Residual standard error: 0.09058 on 14 degrees of freedom
## (323 observations deleted due to missingness)
## Multiple R-squared: 0.9193, Adjusted R-squared: 0.9135
## F-statistic: 159.4 on 1 and 14 DF, p-value: 4.86e-09
```

Table S1: Results of chemical analysis in the soil. Mean  $\pm$  standard error. Different letters in each soil depth indicate significant differences between treatments (Tukey's test,  $p < 0.05$ ). When a transformation of the data was performed, it is represented over the results of ad-hoc analysis (ln = log transformation). When a non-parametric analysis of Kruskal-Wallis was performed, it is represented as KW.

| Irrigation | Plant   | Depth (cm) | NO3 – N (mg kg <sup>-1</sup> ) |    | NH4 – N (mg kg <sup>-1</sup> ) |    | TN (%)            |    | TOC (%)          |    | Olsen P (mg kg <sup>-1</sup> ) |    | TP (mg kg <sup>-1</sup> ) |    | P retention (%) |   | Mg (%)           |    | Ca (%)           |    | K (%)            |    |
|------------|---------|------------|--------------------------------|----|--------------------------------|----|-------------------|----|------------------|----|--------------------------------|----|---------------------------|----|-----------------|---|------------------|----|------------------|----|------------------|----|
|            |         |            | KW                             |    | ln                             |    | ln                |    | ln               |    | ln                             |    | ln                        |    | ln              |   |                  |    |                  |    |                  |    |
| No         | Kanuka  | 7.5        | 46 $\pm$ 4.2                   | a  | 15 $\pm$ 1                     | a  | 0.32 $\pm$ 0.02   | a  | 4.8 $\pm$ 0.27   | a  | 77 $\pm$ 9.5                   | a  | 532 $\pm$ 25              | a  |                 |   | 0.22 $\pm$ 0.003 | b  | 0.67 $\pm$ 0.006 | b  | 0.14 $\pm$ 0.003 | a  |
| No         | Pasture | 7.5        | 0.8 $\pm$ 0.14                 | c  | 7.4 $\pm$ 0.4                  | a  | 0.27 $\pm$ 0.01   | a  | 3.1 $\pm$ 0.12   | ab | 40 $\pm$ 3                     | ab | 548 $\pm$ 13              | a  | 12 $\pm$ 0.4    | b | 0.26 $\pm$ 0.002 | b  | 0.73 $\pm$ 0.005 | ab | 0.12 $\pm$ 0.004 | a  |
| Yes        | Pasture | 7.5        | 39 $\pm$ 4.1                   | a  | 20 $\pm$ 1.8                   | a  | 0.81 $\pm$ 0.1    | a  | 7.1 $\pm$ 0.88   | a  | 74 $\pm$ 6.3                   | a  | 680 $\pm$ 17              | a  | 9.3 $\pm$ 0.2   | b | 0.24 $\pm$ 0.004 | b  | 0.72 $\pm$ 0.007 | ab | 0.11 $\pm$ 0.002 | a  |
| No         | Pine    | 7.5        | 0.04 $\pm$ 0.01                | d  | 2.5 $\pm$ 0.2                  | b  | 0.08 $\pm$ 0      | b  | 1.5 $\pm$ 0.06   | b  | 18 $\pm$ 0.8                   | b  | 319 $\pm$ 6               | b  | 11 $\pm$ 0.4    | b | 0.31 $\pm$ 0.001 | a  | 0.79 $\pm$ 0.012 | a  | 0.14 $\pm$ 0.006 | a  |
| Yes        | Pine    | 7.5        | 5.3 $\pm$ 0.7                  | b  | 7.4 $\pm$ 0.5                  | a  | 0.22 $\pm$ 0.01   | a  | 3.6 $\pm$ 0.17   | ab | 87 $\pm$ 3.1                   | a  | 566 $\pm$ 19              | a  | 17 $\pm$ 0.8    | a | 0.25 $\pm$ 0.004 | b  | 0.69 $\pm$ 0.012 | b  | 0.11 $\pm$ 0.003 | a  |
|            |         |            |                                |    |                                |    |                   |    |                  |    |                                |    |                           |    |                 |   |                  |    |                  |    |                  |    |
| No         | Kanuka  | 15         | 34 $\pm$ 3                     | a  | 10 $\pm$ 0.8                   | a  |                   |    |                  |    |                                |    |                           |    |                 |   |                  |    |                  |    |                  |    |
| No         | Pasture | 15         | 0.32 $\pm$ 0.02                | d  | 3.8 $\pm$ 0.5                  | b  |                   |    |                  |    |                                |    |                           |    |                 |   |                  |    |                  |    |                  |    |
| Yes        | Pasture | 15         | 8.3 $\pm$ 0.3                  | b  | 3.9 $\pm$ 0.3                  | ab |                   |    |                  |    |                                |    |                           |    |                 |   |                  |    |                  |    |                  |    |
| No         | Pine    | 15         | 0.02 $\pm$ 0                   | e  | 0.52 $\pm$ 0.07                | c  |                   |    |                  |    |                                |    |                           |    |                 |   |                  |    |                  |    |                  |    |
| Yes        | Pine    | 15         | 2.3 $\pm$ 0.3                  | c  | 1.3 $\pm$ 0.1                  | c  |                   |    |                  |    |                                |    |                           |    |                 |   |                  |    |                  |    |                  |    |
|            |         |            |                                |    |                                |    |                   |    |                  |    |                                |    |                           |    |                 |   |                  |    |                  |    |                  |    |
| No         | Kanuka  | 30         | 21 $\pm$ 2.2                   | a  | 3 $\pm$ 0.3                    | a  | 0.16 $\pm$ 0.01   | a  | 2.5 $\pm$ 0.17   | a  | 26 $\pm$ 6.7                   | bc | 358 $\pm$ 12              | bc |                 |   | 0.24 $\pm$ 0.003 | c  | 0.78 $\pm$ 0.017 | a  | 0.12 $\pm$ 0.004 | a  |
| No         | Pasture | 30         | 0.7 $\pm$ 0.1                  | c  | 1.2 $\pm$ 0.2                  | ab | 0.10 $\pm$ 0.002  | a  | 1.3 $\pm$ 0.03   | a  | 33 $\pm$ 4.8                   | ab | 470 $\pm$ 18              | ab |                 |   | 0.27 $\pm$ 0.002 | bc | 0.74 $\pm$ 0.009 | a  | 0.13 $\pm$ 0.005 | a  |
| Yes        | Pasture | 30         | 2.7 $\pm$ 0.1                  | b  | 1.1 $\pm$ 0.1                  | b  | 0.035 $\pm$ 0.001 | b  | 0.31 $\pm$ 0.01  | b  | 68 $\pm$ 1.7                   | a  | 621 $\pm$ 26              | a  |                 |   | 0.28 $\pm$ 0.002 | ab | 0.71 $\pm$ 0.006 | a  | 0.11 $\pm$ 0.003 | a  |
| No         | Pine    | 30         | 0.02 $\pm$ 0                   | d  | 0.26 $\pm$ 0.03                | bc | 0.031 $\pm$ 0.001 | b  | 0.39 $\pm$ 0.01  | b  | 5.1 $\pm$ 0.7                  | c  | 265 $\pm$ 4               | c  |                 |   | 0.29 $\pm$ 0.003 | a  | 0.77 $\pm$ 0.014 | a  | 0.13 $\pm$ 0.005 | a  |
| Yes        | Pine    | 30         | 0.45 $\pm$ 0.03                | c  | 0.16 $\pm$ 0.02                | c  | 0.036 $\pm$ 0.001 | b  | 0.45 $\pm$ 0.01  | b  | 53 $\pm$ 7.5                   | ab | 423 $\pm$ 21              | b  |                 |   | 0.27 $\pm$ 0.001 | ab | 0.71 $\pm$ 0.011 | a  | 0.11 $\pm$ 0.004 | a  |
|            |         |            |                                |    |                                |    |                   |    |                  |    |                                |    |                           |    |                 |   |                  |    |                  |    |                  |    |
| No         | Kanuka  | 45         | 22 $\pm$ 2.2                   | a  | 3 $\pm$ 0.4                    | a  |                   |    |                  |    |                                |    |                           |    |                 |   |                  |    |                  |    |                  |    |
| No         | Pasture | 45         | 0.7 $\pm$ 0.1                  | b  | 1.2 $\pm$ 0.1                  | ab |                   |    |                  |    |                                |    |                           |    |                 |   |                  |    |                  |    |                  |    |
| Yes        | Pasture | 45         | 4.4 $\pm$ 0.2                  | a  | 0.9 $\pm$ 0.08                 | b  |                   |    |                  |    |                                |    |                           |    |                 |   |                  |    |                  |    |                  |    |
| No         | Pine    | 45         | 0.03 $\pm$ 0                   | c  | 0.04 $\pm$ 0.01                | c  |                   |    |                  |    |                                |    |                           |    |                 |   |                  |    |                  |    |                  |    |
| Yes        | Pine    | 45         | 1.1 $\pm$ 0.1                  | b  | 0.02 $\pm$ 0                   | c  |                   |    |                  |    |                                |    |                           |    |                 |   |                  |    |                  |    |                  |    |
|            |         |            |                                |    |                                |    |                   |    |                  |    |                                |    |                           |    |                 |   |                  |    |                  |    |                  |    |
| No         | Kanuka  | 60         | 15 $\pm$ 2.1                   | a  | 0.7 $\pm$ 0.15                 | a  | 0.061 $\pm$ 0.006 | a  | 0.93 $\pm$ 0.11  | a  | 3.4 $\pm$ 0.5                  | bc | 264 $\pm$ 7               | c  |                 |   | 0.26 $\pm$ 0.001 | b  | 0.73 $\pm$ 0.014 | a  | 0.12 $\pm$ 0.004 | a  |
| No         | Pasture | 60         | 0.14 $\pm$ 0.01                | c  | 0.3 $\pm$ 0.03                 | a  | 0.051 $\pm$ 0.002 | a  | 0.62 $\pm$ 0.03  | a  | 17 $\pm$ 4.1                   | ab | 379 $\pm$ 19              | ab | 7.9 $\pm$ 1.2   | a | 0.26 $\pm$ 0.001 | b  | 0.76 $\pm$ 0.006 | a  | 0.12 $\pm$ 0.004 | a  |
| Yes        | Pasture | 60         | 2.5 $\pm$ 0.1                  | a  | 0.7 $\pm$ 0.13                 | ab | 0.016 $\pm$ 0     | c  | 0.12 $\pm$ 0     | c  | 50 $\pm$ 4.1                   | a  | 540 $\pm$ 29              | a  | 3.0 $\pm$ 0.4   | a | 0.29 $\pm$ 0.002 | a  | 0.73 $\pm$ 0.007 | a  | 0.11 $\pm$ 0.004 | a  |
| No         | Pine    | 60         | 0.03 $\pm$ 0                   | d  | 0.08 $\pm$ 0.01                | ab | 0.019 $\pm$ 0.001 | bc | 0.16 $\pm$ 0.01  | bc | 0.8 $\pm$ 0.3                  | c  | 261 $\pm$ 6               | c  | 4.1 $\pm$ 0.3   | a | 0.29 $\pm$ 0.002 | a  | 0.74 $\pm$ 0.013 | a  | 0.13 $\pm$ 0.005 | a  |
| Yes        | Pine    | 60         | 1.0 $\pm$ 0.2                  | b  | 0 $\pm$ 0                      | c  | 0.031 $\pm$ 0.001 | ab | 0.32 $\pm$ 0.01  | ab | 38 $\pm$ 13.4                  | a  | 363 $\pm$ 30              | bc | 6.1 $\pm$ 0.8   | a | 0.3 $\pm$ 0.005  | a  | 0.74 $\pm$ 0.011 | a  | 0.12 $\pm$ 0.003 | a  |
|            |         |            |                                |    |                                |    |                   |    |                  |    |                                |    |                           |    |                 |   |                  |    |                  |    |                  |    |
| No         | Kanuka  | 80         | 11 $\pm$ 1.1                   | a  | 0.12 $\pm$ 0.03                | a  |                   |    |                  |    |                                |    |                           |    |                 |   |                  |    |                  |    |                  |    |
| No         | Pasture | 80         | 0.34 $\pm$ 0.02                | c  | 0.02 $\pm$ 0                   | a  |                   |    |                  |    |                                |    |                           |    |                 |   |                  |    |                  |    |                  |    |
| Yes        | Pasture | 80         | 2.9 $\pm$ 0.1                  | a  | 0.08 $\pm$ 0.03                | a  |                   |    |                  |    |                                |    |                           |    |                 |   |                  |    |                  |    |                  |    |
| No         | Pine    | 80         | 0.09 $\pm$ 0.01                | d  | 0.08 $\pm$ 0.03                | a  |                   |    |                  |    |                                |    |                           |    |                 |   |                  |    |                  |    |                  |    |
| Yes        | Pine    | 80         | 1.3 $\pm$ 0.2                  | b  | 0 $\pm$ 0                      | a  |                   |    |                  |    |                                |    |                           |    |                 |   |                  |    |                  |    |                  |    |
|            |         |            |                                |    |                                |    |                   |    |                  |    |                                |    |                           |    |                 |   |                  |    |                  |    |                  |    |
| No         | Kanuka  | 100        | 12 $\pm$ 2.5                   | a  | 1.1 $\pm$ 0.11                 | a  | 0.019 $\pm$ 0.003 | a  | 0.17 $\pm$ 0.024 | a  | 6.7 $\pm$ 1.8                  | ab | 250 $\pm$ 5               | b  |                 |   | 0.28 $\pm$ 0.003 | a  | 0.78 $\pm$ 0.015 | a  | 0.2 $\pm$ 0.003  | a  |
| No         | Pasture | 100        | 0.43 $\pm$ 0.1                 | b  | 0.2 $\pm$ 0.06                 | b  | 0.021 $\pm$ 0.006 | a  | 0.28 $\pm$ 0.11  | ab | 3.8 $\pm$ 0.6                  | bc | 275 $\pm$ 10              | b  | 4.2 $\pm$ 0.6   | a | 0.27 $\pm$ 0.008 | a  | 0.8 $\pm$ 0.029  | a  | 0.18 $\pm$ 0.014 | a  |
| Yes        | Pasture | 100        | 3.1 $\pm$ 0.6                  | a  | 0.2 $\pm$ 0.07                 | ab | 0.01 $\pm$ 0.001  | ab | 0.07 $\pm$ 0.004 | c  | 20 $\pm$ 0.9                   | a  | 374 $\pm$ 3               | a  | 1.6 $\pm$ 0.2   | a | 0.27 $\pm$ 0.005 | a  | 0.81 $\pm$ 0.001 | a  | 0.17 $\pm$ 0.003 | a  |
| No         | Pine    | 100        | 0.05 $\pm$ 0.01                | c  | 0.2 $\pm$ 0.08                 | ab | 0.008 $\pm$ 0     | b  | 0.07 $\pm$ 0.001 | bc | 1.3 $\pm$ 0.1                  | c  | 254 $\pm$ 3               | b  | 2.1 $\pm$ 0.1   | a | 0.28 $\pm$ 0.001 | a  | 0.75 $\pm$ 0.004 | a  | 0.16 $\pm$ 0.004 | a  |
| Yes        | Pine    | 100        | 0.25 $\pm$ 0.1                 | bc | 0.98 $\pm$ 0.48                | ab | 0.012 $\pm$ 0     | a  | 0.12 $\pm$ 0.006 | a  | 4.4 $\pm$ 0.9                  | bc | 264 $\pm$ 3               | b  | 3.2 $\pm$ 0.2   | a | 0.28 $\pm$ 0     | a  | 0.74 $\pm$ 0.007 | a  | 0.15 $\pm$ 0.001 | a  |
|            |         |            |                                |    |                                |    |                   |    |                  |    |                                |    |                           |    |                 |   |                  |    |                  |    |                  |    |
| No         | Kanuka  | 200        | 8.6 $\pm$ 1.5                  | a  | 0.5 $\pm$ 0.12                 | a  | 0.011 $\pm$ 0.001 | a  | 0.08 $\pm$ 0.008 | a  | 5.7 $\pm$ 0.7                  | b  | 278 $\pm$ 2               | b  |                 |   | 0.28 $\pm$ 0.001 | b  | 0.81 $\pm$ 0.005 | a  | 0.17 $\pm$ 0.004 | ab |
| No         | Pasture | 200        | 0.8 $\pm$ 0.2                  | bc | 0.1 $\pm$ 0.04                 | a  | 0.011 $\pm$ 0.001 | a  | 0.1 $\pm$ 0.006  | a  | 3.5 $\pm$ 0.7                  | b  | 279 $\pm$ 4               | b  | 3.3 $\pm$ 0.3   | a | 0.27 $\pm$ 0.001 | b  | 0.78 $\pm$ 0.007 | ab | 0.2 $\pm$ 0.001  | a  |
| Yes        | Pasture | 200        | 3.3 $\pm$ 1                    | ab | 0.2 $\pm$ 0.09                 | a  | 0.011 $\pm$ 0.001 | a  | 0.08 $\pm$ 0.003 | a  | 15 $\pm$ 0.4                   | a  | 355 $\pm$ 5               | a  | 1.6 $\pm$ 0.1   | a | 0.3 $\pm$ 0.004  | a  | 0.82 $\pm$ 0.004 | a  | 0.2 $\pm$ 0.009  | a  |
| No         | Pine    | 200        | 0.01 $\pm$ 0.01                | d  | 0.9 $\pm$ 0.36                 | a  | 0.009 $\pm$ 0.001 | a  | 0.13 $\pm$ 0.046 | a  | 1.1 $\pm$ 0.1                  | c  | 265 $\pm$ 2               | b  | 2.0 $\pm$ 0.5   | a | 0.29 $\pm$ 0.003 | a  | 0.78 $\pm$ 0.013 | ab | 0.17 $\pm$ 0.01  | ab |
| Yes        | Pine    | 200        | 0.96 $\pm$ 0.44                | c  | 0.5 $\pm$ 0.25                 | a  | 0.013 $\pm$ 0.002 | a  | 0.16 $\pm$ 0.035 | a  | 4.5 $\pm$ 1.1                  | b  | 264 $\pm$ 1               | b  | 2.3 $\pm$ 0.1   | a | 0.26 $\pm$ 0.003 | c  | 0.73 $\pm$ 0.016 | b  | 0.15 $\pm$ 0.002 | b  |
|            |         |            |                                |    |                                |    |                   |    |                  |    |                                |    |                           |    |                 |   |                  |    |                  |    |                  |    |
| No         | Kanuka  | 300        | 8.5 $\pm$ 0.8                  | a  | 0.4 $\pm$ 0.05                 | a  | 0.016 $\pm$ 0.001 | a  | 0.13 $\pm$ 0.012 | a  | 15 $\pm$ 4.1                   | a  | 304 $\pm$ 17              | a  |                 |   | 0.27 $\pm$ 0.007 | ab | 0.81 $\pm$ 0.024 | a  | 0.19 $\pm$ 0.005 | a  |
| No         | Pasture | 300        | 0.7 $\pm$ 0.1                  | b  | 0.3 $\pm$ 0.09                 | a  | 0.014 $\pm$ 0.001 | a  | 0.12 $\pm$ 0.008 | a  | 26 $\pm$ 1.4                   | a  | 347 $\pm$ 2               | a  |                 |   | 0.25 $\pm$ 0.002 | b  | 0.74 $\pm$ 0.015 | a  | 0.17 $\pm$ 0.004 | a  |
| Yes        | Pasture | 300        | 8.5 $\pm$ 1.6                  | a  | 0.4 $\pm$ 0.02                 | a  | 0.013 $\pm$ 0     | a  | 0.09 $\pm$ 0.004 | a  | 16 $\pm$ 1.3                   | a  | 340 $\pm$ 7               | a  |                 |   | 0.28 $\pm$ 0.007 | a  | 0.81 $\pm$ 0.019 | a  | 0.18 $\pm$ 0.008 | a  |

Table S2: Results of chemical analysis in the soil. Mean  $\pm$  standard error. Different letters in each soil depth indicate significant differences between treatments (Tukey's test,  $p < 0.05$ ). When a transformation of the data was performed, it is represented over the results of ad-hoc analysis (ln = log transformation). When a non-parametric analysis of Kruskal-Wallis was performed, it is represented as KW.

| Irrigation | Plant   | Depth | pH         |    | EC (μS cm <sup>-1</sup> ) |    | Na (mg kg <sup>-1</sup> ) |     | Mn (mg kg <sup>-1</sup> ) |    | Cu (mg kg <sup>-1</sup> ) |    | Zn (mg kg <sup>-1</sup> ) |     |
|------------|---------|-------|------------|----|---------------------------|----|---------------------------|-----|---------------------------|----|---------------------------|----|---------------------------|-----|
|            |         |       |            |    |                           | ln |                           | ln  |                           |    | KW                        |    | KW                        |     |
| No         | Kanuka  | 7.5   | 4.2 ± 0.02 | c  | 202 ± 12                  | a  | 469 ± 3                   | c   | 210 ± 3                   | b  | 6.9 ± 0.34                | b  | 34 ± 0.5                  | b   |
| No         | Pasture | 7.5   | 5.3 ± 0.04 | a  | 62 ± 2.4                  | b  | 498 ± 5                   | bc  | 265 ± 6                   | a  | 7 ± 0.21                  | b  | 44 ± 0.5                  | a   |
| Yes        | Pasture | 7.5   | 4.5 ± 0.03 | bc | 81 ± 5.9                  | b  | 599 ± 26                  | ab  | 224 ± 3                   | ab | 9.9 ± 0.32                | a  | 44 ± 0.6                  | a   |
| No         | Pine    | 7.5   | 5.2 ± 0.03 | a  | 84 ± 3.9                  | b  | 677 ± 17                  | a   | 210 ± 5                   | b  | 3.3 ± 0.04                | d  | 35 ± 0.5                  | b   |
| Yes        | Pine    | 7.5   | 4.7 ± 0.03 | b  | 89 ± 3.8                  | b  | 491 ± 12                  | bc  | 195 ± 7                   | b  | 4.4 ± 0.07                | c  | 33 ± 0.7                  | b   |
|            |         |       |            |    |                           | KW |                           |     |                           |    |                           |    |                           |     |
| No         | Kanuka  | 15    | 4.4 ± 0.05 | b  | 130 ± 7.3                 | a  |                           |     |                           |    |                           |    |                           |     |
| No         | Pasture | 15    | 5.4 ± 0.03 | a  | 24 ± 0.6                  | d  |                           |     |                           |    |                           |    |                           |     |
| Yes        | Pasture | 15    | 4.4 ± 0.03 | b  | 39 ± 0.9                  | c  |                           |     |                           |    |                           |    |                           |     |
| No         | Pine    | 15    | 5.5 ± 0.03 | a  | 50 ± 1                    | b  |                           |     |                           |    |                           |    |                           |     |
| Yes        | Pine    | 15    | 5.1 ± 0.03 | a  | 44 ± 2.3                  | c  |                           |     |                           |    |                           |    |                           |     |
|            |         |       |            |    |                           | ln |                           | KW  |                           | KW |                           | KW |                           | ln  |
| No         | Kanuka  | 30    | 4.7 ± 0.07 | c  | 97 ± 7.7                  | a  | 493 ± 5                   | b   | 251 ± 8                   | a  | 4.9 ± 0.16                | a  | 32 ± 0.3                  | b   |
| No         | Pasture | 30    | 5.4 ± 0.03 | ab | 21 ± 0.7                  | b  | 498 ± 8                   | b   | 235 ± 3                   | a  | 5.1 ± 0.22                | a  | 36 ± 0.6                  | ab  |
| Yes        | Pasture | 30    | 4.9 ± 0.06 | bc | 25 ± 0.6                  | b  | 561 ± 16                  | b   | 210 ± 4                   | ab | 4.9 ± 0.16                | a  | 37 ± 0.6                  | a   |
| No         | Pine    | 30    | 5.6 ± 0.02 | a  | 48 ± 1.1                  | a  | 681 ± 5                   | a   | 208 ± 3                   | b  | 3.4 ± 0.04                | b  | 32 ± 0.2                  | ab  |
| Yes        | Pine    | 30    | 5.4 ± 0.05 | ab | 21 ± 0.6                  | b  | 511 ± 24                  | b   | 208 ± 4                   | b  | 3.7 ± 0.07                | b  | 32 ± 0.3                  | ab  |
|            |         |       |            |    |                           | ln |                           |     |                           |    |                           |    |                           |     |
| No         | Kanuka  | 45    | 5 ± 0.08   | bc | 89 ± 6.9                  | a  |                           |     |                           |    |                           |    |                           |     |
| No         | Pasture | 45    | 5.6 ± 0.03 | a  | 19 ± 0.5                  | c  |                           |     |                           |    |                           |    |                           |     |
| Yes        | Pasture | 45    | 4.5 ± 0.03 | c  | 27 ± 0.6                  | bc |                           |     |                           |    |                           |    |                           |     |
| No         | Pine    | 45    | 6 ± 0.04   | a  | 37 ± 1.2                  | b  |                           |     |                           |    |                           |    |                           |     |
| Yes        | Pine    | 45    | 5.5 ± 0.04 | ab | 24 ± 0.9                  | bc |                           |     |                           |    |                           |    |                           |     |
|            |         |       |            |    |                           | KW |                           | KW  |                           | KW |                           | KW |                           | KW  |
| No         | Kanuka  | 60    | 5.1 ± 0.06 | a  | 77 ± 9.4                  | a  | 530 ± 7                   | b   | 237 ± 8                   | a  | 4 ± 0.06                  | ab | 32 ± 0.1                  | c   |
| No         | Pasture | 60    | 5.9 ± 0.14 | a  | 18 ± 1                    | b  | 521 ± 6                   | b   | 219 ± 3                   | a  | 4 ± 0.06                  | ab | 35 ± 0.7                  | bc  |
| Yes        | Pasture | 60    | 4.9 ± 0.04 | a  | 21 ± 0.5                  | b  | 546 ± 15                  | b   | 222 ± 4                   | a  | 4.4 ± 0.09                | a  | 37 ± 0.6                  | a   |
| No         | Pine    | 60    | 5.8 ± 0.04 | a  | 36 ± 2.4                  | a  | 695 ± 13                  | a   | 207 ± 3                   | a  | 3.8 ± 0.06                | b  | 33 ± 0.3                  | bc  |
| Yes        | Pine    | 60    | 5.7 ± 0.05 | a  | 20 ± 0.6                  | b  | 528 ± 23                  | b   | 201 ± 5                   | a  | 3.6 ± 0.06                | b  | 34 ± 0.6                  | ab  |
|            |         |       |            |    |                           | ln |                           |     |                           |    |                           |    |                           |     |
| No         | Kanuka  | 80    | 5.8 ± 0.08 | ab | 47 ± 4.4                  | a  |                           |     |                           |    |                           |    |                           |     |
| No         | Pasture | 80    | 6.2 ± 0.11 | a  | 10 ± 0.2                  | c  |                           |     |                           |    |                           |    |                           |     |
| Yes        | Pasture | 80    | 4.9 ± 0.04 | b  | 19 ± 0.5                  | b  |                           |     |                           |    |                           |    |                           |     |
| No         | Pine    | 80    | 6.4 ± 0.02 | a  | 32 ± 2.1                  | ab |                           |     |                           |    |                           |    |                           |     |
| Yes        | Pine    | 80    | 6 ± 0.05   | a  | 21 ± 1                    | b  |                           |     |                           |    |                           |    |                           |     |
|            |         |       |            |    |                           | ln |                           | KW  |                           | KW |                           | KW |                           | KW  |
| No         | Kanuka  | 100   | 5.2 ± 0.04 | b  | 63 ± 13                   | a  | 594 ± 13                  | abc | 205 ± 3                   | a  | 4.9 ± 0.18                | a  | 36 ± 1.4                  | a   |
| No         | Pasture | 100   | 5.9 ± 0.12 | a  | 11 ± 0.7                  | b  | 565 ± 25                  | bc  | 225 ± 8                   | a  | 5.1 ± 0.1                 | a  | 34 ± 1.3                  | abc |
| Yes        | Pasture | 100   | 5.6 ± 0.06 | ab | 21 ± 1.8                  | b  | 619 ± 26                  | ab  | 206 ± 3                   | a  | 4.5 ± 0.09                | a  | 31 ± 0.3                  | bc  |
| No         | Pine    | 100   | 5.8 ± 0.06 | a  | 82 ± 4.3                  | a  | 681 ± 18                  | a   | 174 ± 2                   | b  | 4.7 ± 0.07                | a  | 31 ± 0.1                  | c   |
| Yes        | Pine    | 100   | 5.7 ± 0.02 | ab | 24 ± 2                    | b  | 504 ± 13                  | c   | 176 ± 2                   | b  | 4.6 ± 0.29                | a  | 33 ± 0.2                  | ab  |
|            |         |       |            |    |                           | ln |                           | KW  |                           | KW |                           | ln |                           | ln  |
| No         | Kanuka  | 200   | 5.4 ± 0.02 | a  | 43 ± 1.8                  | ab | 569 ± 16                  | b   | 213 ± 2                   | a  | 7.8 ± 1.78                | a  | 32 ± 0.1                  | a   |
| No         | Pasture | 200   | 5.8 ± 0.03 | a  | 10 ± 0.4                  | c  | 697 ± 3                   | a   | 204 ± 2                   | a  | 4.9 ± 0.05                | a  | 32 ± 0.2                  | a   |
| Yes        | Pasture | 200   | 5.5 ± 0.05 | a  | 31 ± 3.5                  | b  | 608 ± 11                  | ab  | 212 ± 3                   | a  | 5 ± 0.23                  | a  | 32 ± 0.6                  | a   |
| No         | Pine    | 200   | 5.7 ± 0.13 | a  | 88 ± 15                   | a  | 598 ± 11                  | ab  | 181 ± 2                   | b  | 4.6 ± 0.12                | a  | 33 ± 0.3                  | a   |
| Yes        | Pine    | 200   | 5.7 ± 0.03 | a  | 35 ± 2.2                  | b  | 571 ± 4                   | b   | 162 ± 3                   | b  | 4.2 ± 0.2                 | a  | 30 ± 0.1                  | a   |
|            |         |       |            |    |                           | ln |                           | KW  |                           | KW |                           | KW |                           | KW  |
| No         | Kanuka  | 300   | 5.3 ± 0.08 | a  | 65 ± 11.2                 | a  | 637 ± 6                   | a   | 201 ± 7                   | a  | 5.4 ± 0.05                | a  | 33 ± 0.5                  | a   |
| No         | Pasture | 300   | 5.7 ± 0.07 | a  | 11 ± 0.3                  | b  | 607 ± 4                   | a   | 195 ± 13                  | a  | 5.1 ± 0.16                | a  | 30 ± 0.2                  | b   |
| Yes        | Pasture | 300   | 5.4 ± 0.06 | a  | 39 ± 5.9                  | a  | 674 ± 29                  | a   | 206 ± 6                   | a  | 5.1 ± 0.21                | a  | 32 ± 0.6                  | a   |

Colour-blind friendly graphs equivalent to the ones in the main manuscript body:

Figure S2. Average and standard error of the soil parameters at the different treatments (irrigated vs non-irrigated, pine vs pasture vs k  nuka) and at increasing soil depths.

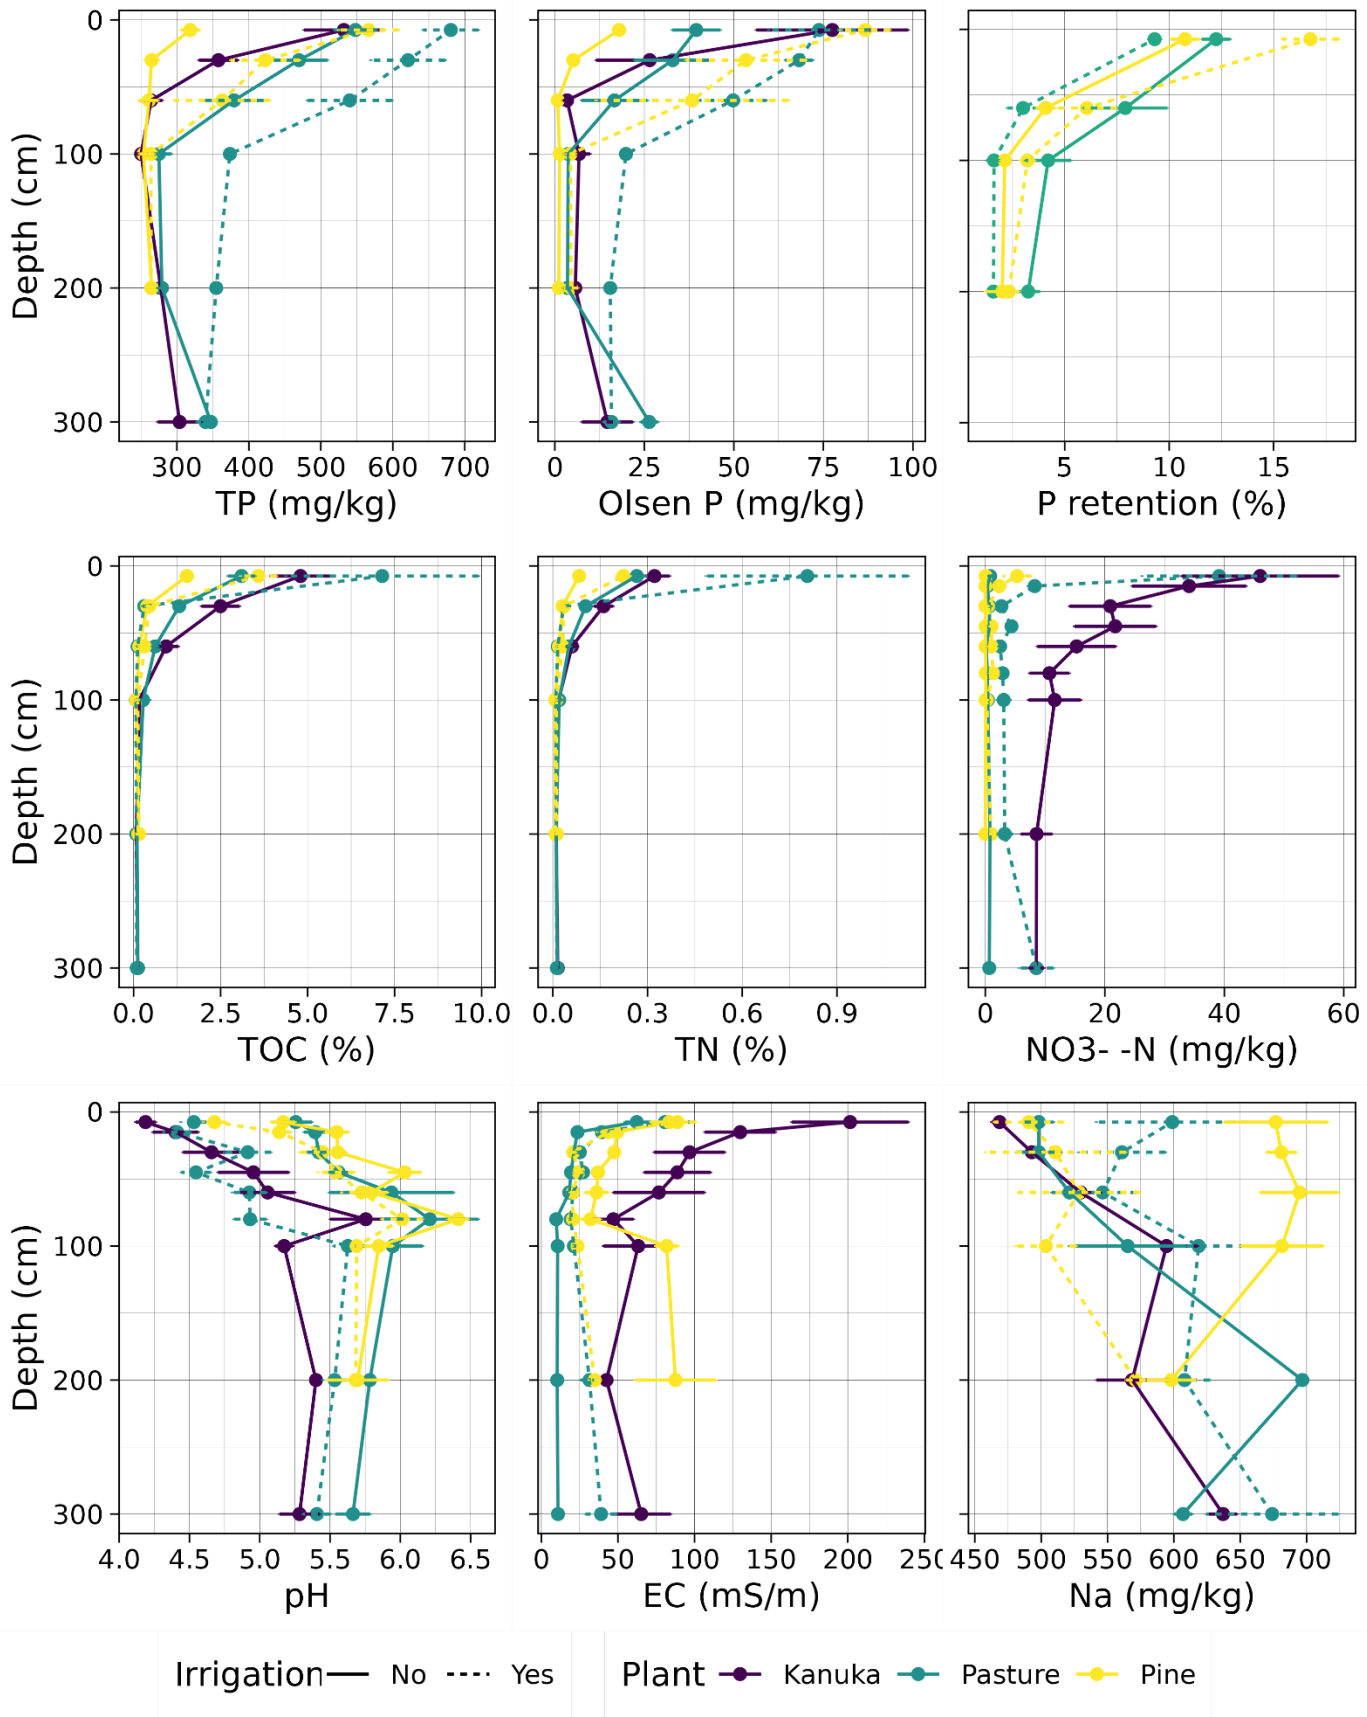

Figure S3. Principal component analysis of the chemical results in the topsoil (0 – 7.5 cm). A) biplot with the variable weighting and the scatterplot. B) Scatterplot with groups based on plant and irrigation. Ellipse shows confidence regions.

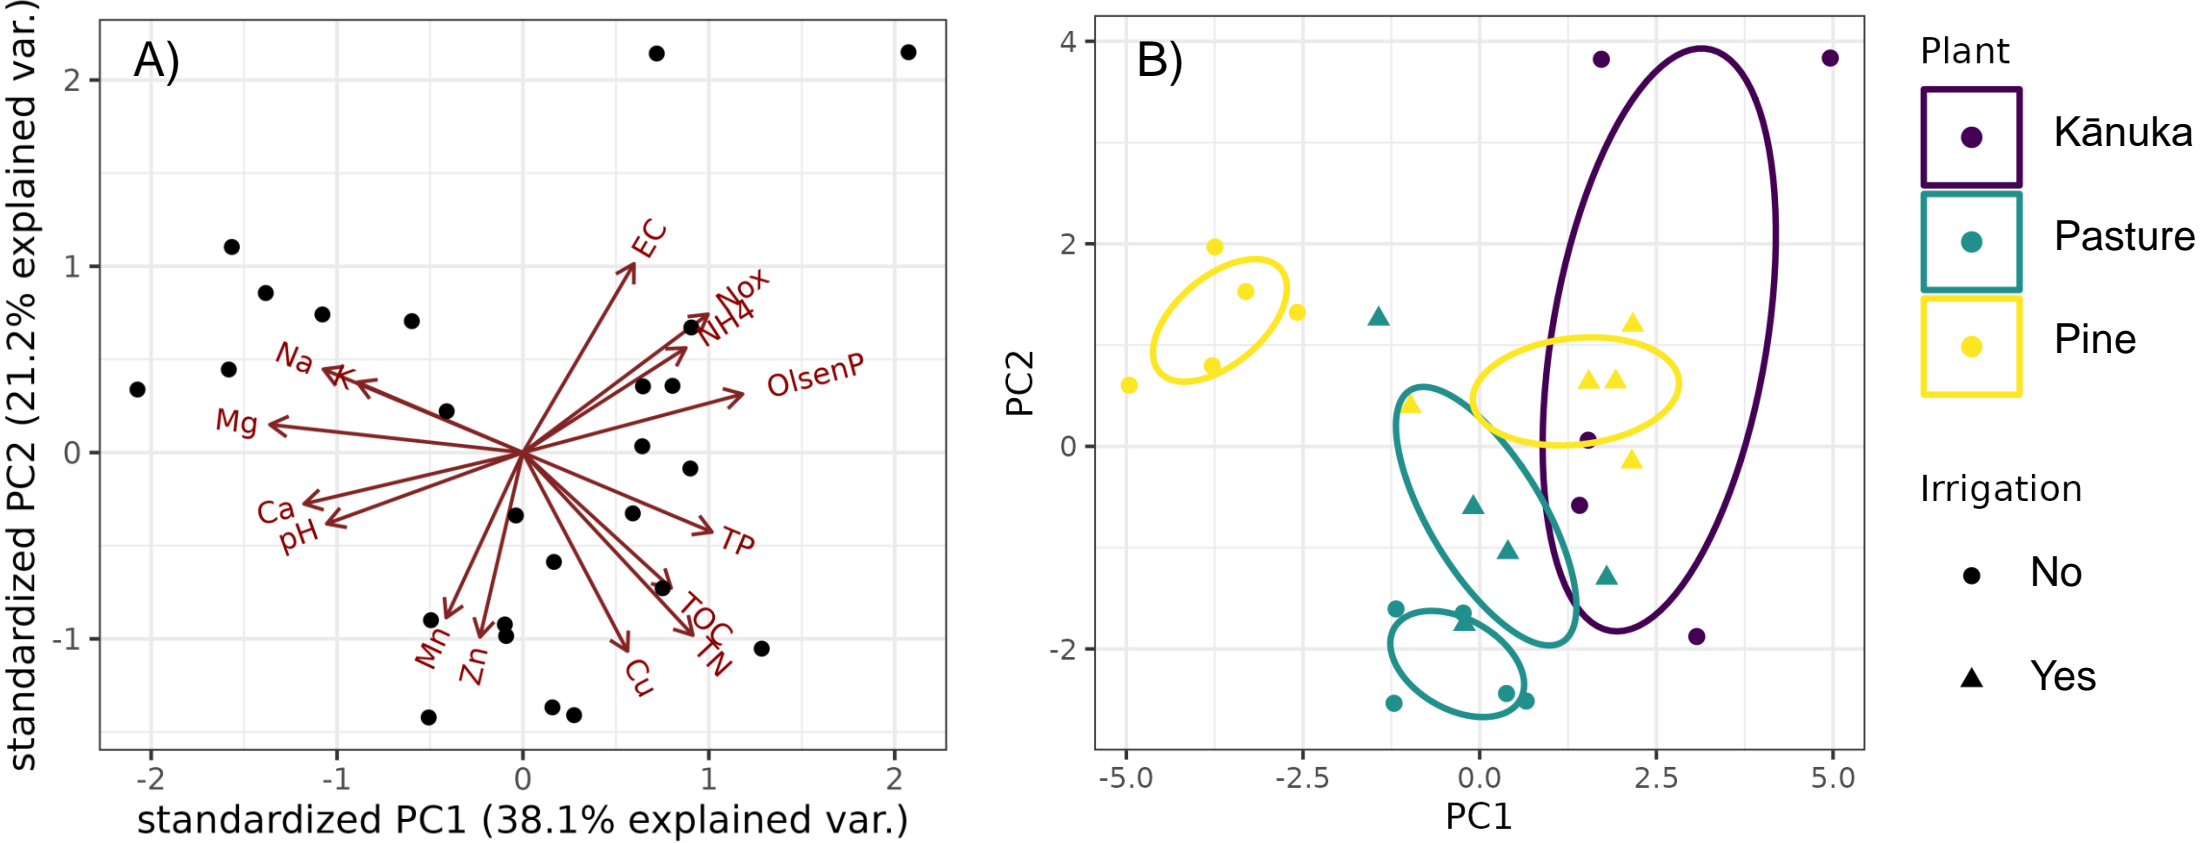



Figure S4. Boxplots of the element stocks in the soil (0 – 80 cm) calculated per hectare. Different letters in each graph indicate significant differences between groups (Tukey’s test,  $p < 0.05$ ).

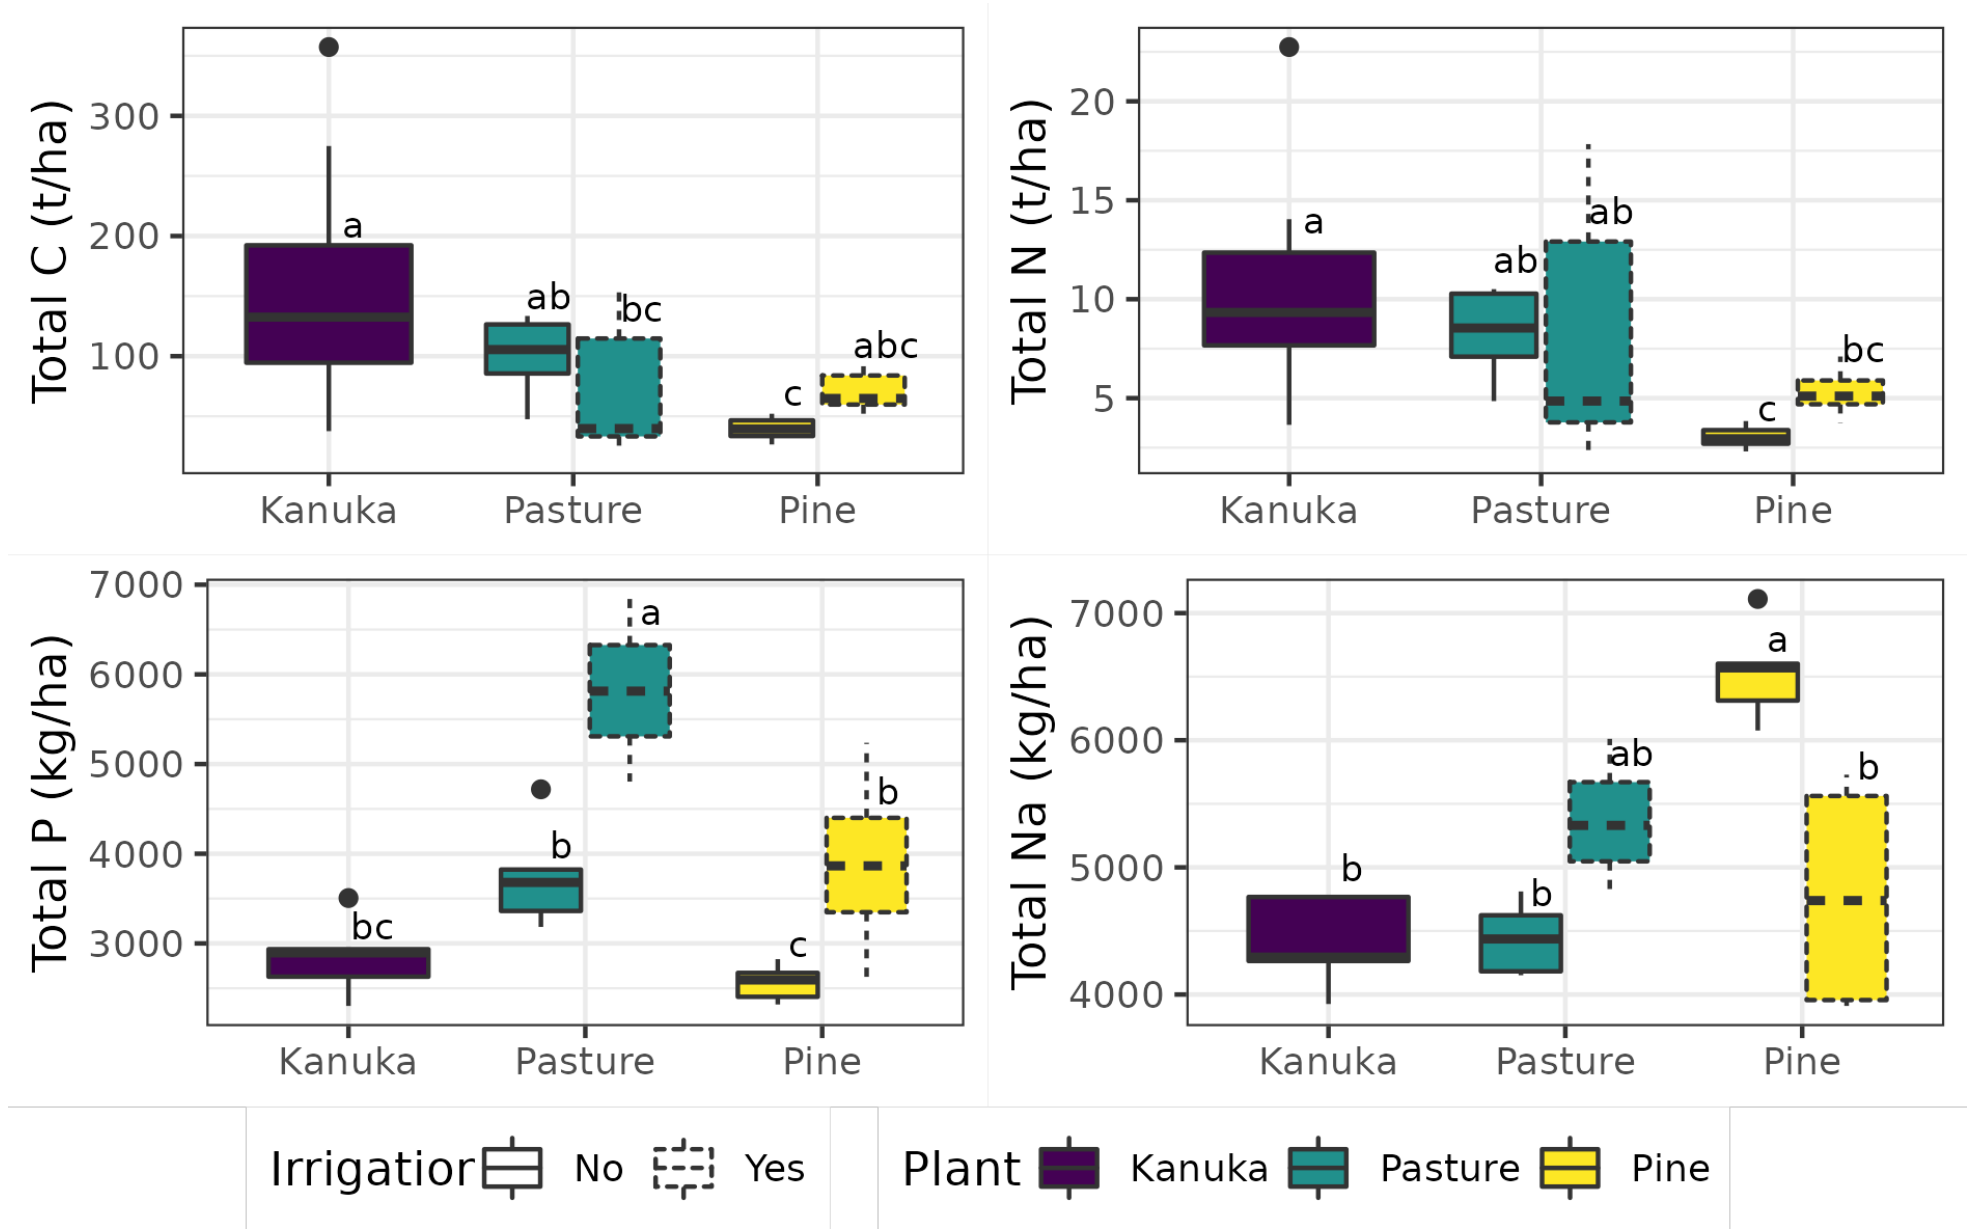

Supplement: s1 [file s1]
